# Supplementary material for: Potential Geographic Range of the Endangered Reed Parrotbill Paradoxornis heudei under Climate Change
Source: MDPI journal article supplement (doi:10.3390/biology12040560), 2023-04-06
Supplement: s1 [file s1]

**Table S1.** Detailed distributional records of *Paradoxornis heudei* in the present study.

| Species                    | Order | Latitude (N) | Longitude (E) |
|----------------------------|-------|--------------|---------------|
| <i>Paradoxornis heudei</i> | 1     | 29.97920     | 121.71600     |
| <i>Paradoxornis heudei</i> | 2     | 30.21000     | 120.83700     |
| <i>Paradoxornis heudei</i> | 3     | 30.63590     | 122.06300     |
| <i>Paradoxornis heudei</i> | 4     | 30.85470     | 121.69000     |
| <i>Paradoxornis heudei</i> | 5     | 30.89100     | 121.93800     |
| <i>Paradoxornis heudei</i> | 6     | 30.89180     | 121.90200     |
| <i>Paradoxornis heudei</i> | 7     | 31.00120     | 121.90700     |
| <i>Paradoxornis heudei</i> | 8     | 31.20920     | 121.78200     |
| <i>Paradoxornis heudei</i> | 9     | 31.21570     | 121.54500     |
| <i>Paradoxornis heudei</i> | 10    | 31.29000     | 121.70800     |
| <i>Paradoxornis heudei</i> | 11    | 31.29730     | 121.85900     |
| <i>Paradoxornis heudei</i> | 12    | 31.36050     | 121.78700     |
| <i>Paradoxornis heudei</i> | 13    | 31.46100     | 121.93000     |
| <i>Paradoxornis heudei</i> | 14    | 31.49960     | 121.98500     |
| <i>Paradoxornis heudei</i> | 15    | 31.51000     | 121.96400     |
| <i>Paradoxornis heudei</i> | 16    | 31.60620     | 121.84900     |
| <i>Paradoxornis heudei</i> | 17    | 31.67360     | 121.63500     |
| <i>Paradoxornis heudei</i> | 18    | 31.69160     | 121.58300     |
| <i>Paradoxornis heudei</i> | 19    | 31.72490     | 121.24300     |
| <i>Paradoxornis heudei</i> | 20    | 31.78790     | 120.85500     |
| <i>Paradoxornis heudei</i> | 21    | 32.00980     | 118.64200     |
| <i>Paradoxornis heudei</i> | 22    | 32.18510     | 118.86300     |
| <i>Paradoxornis heudei</i> | 23    | 32.28270     | 121.40900     |
| <i>Paradoxornis heudei</i> | 24    | 32.52840     | 121.10100     |
| <i>Paradoxornis heudei</i> | 25    | 32.53930     | 121.11500     |
| <i>Paradoxornis heudei</i> | 26    | 32.54420     | 120.99800     |
| <i>Paradoxornis heudei</i> | 27    | 32.58680     | 120.96409     |
| <i>Paradoxornis heudei</i> | 28    | 32.86820     | 120.91200     |
| <i>Paradoxornis heudei</i> | 29    | 33.05420     | 120.80600     |
| <i>Paradoxornis heudei</i> | 30    | 33.32910     | 120.66000     |
| <i>Paradoxornis heudei</i> | 31    | 33.40000     | 118.46667     |
| <i>Paradoxornis heudei</i> | 32    | 33.53900     | 120.54700     |
| <i>Paradoxornis heudei</i> | 33    | 33.55760     | 120.42900     |
| <i>Paradoxornis heudei</i> | 34    | 33.58260     | 120.37700     |
| <i>Paradoxornis heudei</i> | 35    | 33.60230     | 120.50700     |
| <i>Paradoxornis heudei</i> | 36    | 33.62810     | 120.53400     |
| <i>Paradoxornis heudei</i> | 37    | 33.63619     | 120.49100     |
| <i>Paradoxornis heudei</i> | 38    | 33.66670     | 120.51100     |

| Species                    | Order | Latitude (N) | Longitude (E) |
|----------------------------|-------|--------------|---------------|
| <i>Paradoxornis heudei</i> | 39    | 33.77663     | 120.47631     |
| <i>Paradoxornis heudei</i> | 40    | 34.34270     | 120.18000     |
| <i>Paradoxornis heudei</i> | 41    | 34.40000     | 115.65000     |
| <i>Paradoxornis heudei</i> | 42    | 34.76690     | 119.20400     |
| <i>Paradoxornis heudei</i> | 43    | 34.78950     | 119.25100     |
| <i>Paradoxornis heudei</i> | 44    | 34.93620     | 114.50600     |
| <i>Paradoxornis heudei</i> | 45    | 35.03333     | 114.40000     |
| <i>Paradoxornis heudei</i> | 46    | 35.31210     | 116.59900     |
| <i>Paradoxornis heudei</i> | 47    | 36.15420     | 120.10300     |
| <i>Paradoxornis heudei</i> | 48    | 36.16800     | 120.12300     |
| <i>Paradoxornis heudei</i> | 49    | 36.68780     | 120.50000     |
| <i>Paradoxornis heudei</i> | 50    | 37.45000     | 118.50000     |
| <i>Paradoxornis heudei</i> | 51    | 37.55650     | 115.58900     |
| <i>Paradoxornis heudei</i> | 52    | 37.61720     | 115.59400     |
| <i>Paradoxornis heudei</i> | 53    | 37.64080     | 115.64400     |
| <i>Paradoxornis heudei</i> | 54    | 37.82920     | 119.01900     |
| <i>Paradoxornis heudei</i> | 55    | 38.78860     | 117.41900     |
| <i>Paradoxornis heudei</i> | 56    | 38.93130     | 115.97800     |
| <i>Paradoxornis heudei</i> | 57    | 39.04330     | 118.28800     |
| <i>Paradoxornis heudei</i> | 58    | 39.06800     | 118.21300     |
| <i>Paradoxornis heudei</i> | 59    | 39.12760     | 117.68400     |
| <i>Paradoxornis heudei</i> | 60    | 39.12830     | 122.03500     |
| <i>Paradoxornis heudei</i> | 61    | 39.13880     | 118.28100     |
| <i>Paradoxornis heudei</i> | 62    | 39.17540     | 118.33700     |
| <i>Paradoxornis heudei</i> | 63    | 39.19740     | 118.86600     |
| <i>Paradoxornis heudei</i> | 64    | 39.23880     | 118.34900     |
| <i>Paradoxornis heudei</i> | 65    | 39.27950     | 117.51700     |
| <i>Paradoxornis heudei</i> | 66    | 39.69100     | 116.03400     |
| <i>Paradoxornis heudei</i> | 67    | 39.82180     | 119.52300     |
| <i>Paradoxornis heudei</i> | 68    | 39.83990     | 116.22700     |
| <i>Paradoxornis heudei</i> | 69    | 39.86620     | 116.74800     |
| <i>Paradoxornis heudei</i> | 70    | 39.87030     | 116.19800     |
| <i>Paradoxornis heudei</i> | 71    | 39.89600     | 116.15900     |
| <i>Paradoxornis heudei</i> | 72    | 39.97244     | 116.08783     |
| <i>Paradoxornis heudei</i> | 73    | 40.10350     | 116.18600     |
| <i>Paradoxornis heudei</i> | 74    | 40.13130     | 116.30800     |
| <i>Paradoxornis heudei</i> | 75    | 40.37790     | 115.82900     |
| <i>Paradoxornis heudei</i> | 76    | 40.40960     | 115.84700     |
| <i>Paradoxornis heudei</i> | 77    | 40.85550     | 121.59502     |
| <i>Paradoxornis heudei</i> | 78    | 40.94340     | 121.75800     |

| Species                    | Order | Latitude (N) | Longitude (E) |
|----------------------------|-------|--------------|---------------|
| <i>Paradoxornis heudei</i> | 79    | 41.04350     | 121.86000     |
| <i>Paradoxornis heudei</i> | 80    | 41.14480     | 121.95300     |
| <i>Paradoxornis heudei</i> | 81    | 43.37430     | 131.74600     |
| <i>Paradoxornis heudei</i> | 82    | 43.39888     | 131.89132     |
| <i>Paradoxornis heudei</i> | 83    | 44.60284     | 132.68036     |
| <i>Paradoxornis heudei</i> | 84    | 44.61900     | 132.41200     |
| <i>Paradoxornis heudei</i> | 85    | 44.75020     | 132.78000     |
| <i>Paradoxornis heudei</i> | 86    | 44.77540     | 132.65900     |
| <i>Paradoxornis heudei</i> | 87    | 46.52330     | 125.16000     |
| <i>Paradoxornis heudei</i> | 88    | 46.71290     | 132.13500     |
| <i>Paradoxornis heudei</i> | 89    | 47.02480     | 129.05700     |
| <i>Paradoxornis heudei</i> | 90    | 47.14150     | 124.27161     |
| <i>Paradoxornis heudei</i> | 91    | 47.20090     | 124.23800     |
| <i>Paradoxornis heudei</i> | 92    | 47.29000     | 118.38900     |
| <i>Paradoxornis heudei</i> | 93    | 47.30620     | 124.52400     |
| <i>Paradoxornis heudei</i> | 94    | 47.33310     | 124.55700     |
| <i>Paradoxornis heudei</i> | 95    | 47.36970     | 118.45590     |
| <i>Paradoxornis heudei</i> | 96    | 47.68490     | 117.59200     |
| <i>Paradoxornis heudei</i> | 97    | 48.37310     | 117.52400     |
